# Supplementary material for: Kidney Transplantation Outcomes of Patients With Chronic Hypotension in Dialysis
Source: PubMed Central journal article supplement — Kidney Int Rep. 2024 Mar 18;9(6):1742–51. doi: 10.1016/j.ekir.2024.03.012 (PMC11184391; doi:10.1016/j.ekir.2024.03.012), 2024-03-18
Supplement: mmc1.pdf [file mmc1.pdf]

## **Table of contents**

1. **Supplementary Table S1.** Episodes of biopsy-proven acute rejection in both groups.
2. **STROBE Checklist**

**Supplementary Table S1.** Episodes of biopsy-proven acute rejection in both groups.

| <b>HYPOTENSIVE PATIENTS</b> |                           |                                     |                         |
|-----------------------------|---------------------------|-------------------------------------|-------------------------|
| <b>Patient</b>              | <b>Early/ Late onset*</b> | <b>Months after transplantation</b> | <b>Type of Reject**</b> |
| 15                          | Early                     | 1 (13th day)                        | ACR borderline          |
| 21                          | Early                     | 2 (40th day)                        | ACR 2a                  |
| 29                          | Late                      | 9                                   | ACR 1b                  |
| 47                          | Early                     | 3                                   | ACR 1a                  |
|                             | Late                      | 65                                  | ACR 1b                  |
| 51                          | Early                     | 1 (13th day)                        | ACR 2a                  |
| 67                          | Early                     | 6                                   | ACR borderline          |
| 71                          | Late                      | 21                                  | ACR 1a                  |
| 93                          | Early                     | 1 (18th day)                        | ACR borderline          |
| 101                         | Early                     | 4                                   | ACR borderline          |
|                             | Late                      | 9                                   | ACR 2a                  |
| 111                         | Early                     | 1 (15th day)                        | Acute AMR               |
| <b>CONTROLS</b>             |                           |                                     |                         |
| <b>Patient</b>              | <b>Early/ Late onset*</b> | <b>Months after transplantation</b> | <b>Type of Reject**</b> |
| 22                          | Early                     | 2                                   | ACR 2a                  |
| 30                          | Late                      | 11                                  | ACR 1a                  |
| 32                          | Early                     | 1 (14th day)                        | ACR 2a                  |
| 42                          | Early                     | 4                                   | ACR borderline          |
| 48                          | Late                      | 57                                  | ACR borderline          |
| 54 <sup>‡</sup>             | Early                     | 1 (4th day)                         | Acute AMR               |
| 56 <sup>‡</sup>             | Early                     | 1 (17th day)                        | ACR 3                   |
| 60                          | Late                      | 40                                  | ACR borderline          |
| 70                          | Early                     | 1 (18th day)                        | Acute AMR               |
| 78                          | Early                     | 3                                   | ACR 1a                  |
| 84                          | Early                     | 4                                   | ACR 1a                  |
| 94                          | Early                     | 6                                   | ACR borderline          |
| 112                         | Early                     | 1 (15th day)                        | Acute AMR               |
| 132                         | Early                     | 1 (14th day)                        | ACR borderline          |

\*Acute onset: ≤ 6 months after transplantation; late onset: > 6 months after transplantation

\*\*According to Banff Criteria <sup>(16-23)</sup>

‡: acute rejection supposed graft loss

Abbreviations: ACR: acute cellular rejection; AMR: antibody mediated rejection

STROBE Statement—checklist of items that should be included in reports of observational studies

|                              | <b>Item<br/>No</b> | <b>Recommendation</b>                                                                                                                                                                                                                                                                                                                                                                                                                                                                                                                                                                                                                                                                                                                                                                                                            |
|------------------------------|--------------------|----------------------------------------------------------------------------------------------------------------------------------------------------------------------------------------------------------------------------------------------------------------------------------------------------------------------------------------------------------------------------------------------------------------------------------------------------------------------------------------------------------------------------------------------------------------------------------------------------------------------------------------------------------------------------------------------------------------------------------------------------------------------------------------------------------------------------------|
| <b>Title and abstract</b>    | 1                  | <p>(a) Indicate the study’s design with a commonly used term in the title or the abstract <a href="#">Page 3, second paragraph</a></p> <hr/> <p>(b) Provide in the abstract an informative and balanced summary of what was done and what was found <a href="#">Page 3</a></p>                                                                                                                                                                                                                                                                                                                                                                                                                                                                                                                                                   |
| <b>Introduction</b>          |                    |                                                                                                                                                                                                                                                                                                                                                                                                                                                                                                                                                                                                                                                                                                                                                                                                                                  |
| Background/rationale         | 2                  | Explain the scientific background and rationale for the investigation being reported <a href="#">Page 5, first paragraph. Page 6, paragraphs 3-5</a>                                                                                                                                                                                                                                                                                                                                                                                                                                                                                                                                                                                                                                                                             |
| Objectives                   | 3                  | State specific objectives, including any prespecified hypotheses <a href="#">Page 6, paragraphs 4-6. Page 8, paragraphs 4-7</a>                                                                                                                                                                                                                                                                                                                                                                                                                                                                                                                                                                                                                                                                                                  |
| <b>Methods</b>               |                    |                                                                                                                                                                                                                                                                                                                                                                                                                                                                                                                                                                                                                                                                                                                                                                                                                                  |
| Study design                 | 4                  | Present key elements of study design early in the paper <a href="#">Page 7, Paragraphs 1-2</a>                                                                                                                                                                                                                                                                                                                                                                                                                                                                                                                                                                                                                                                                                                                                   |
| Setting                      | 5                  | Describe the setting, locations, and relevant dates, including periods of recruitment, exposure, follow-up, and data collection <a href="#">Page 7, first paragraph. Page 9, paragraphs 1-2</a>                                                                                                                                                                                                                                                                                                                                                                                                                                                                                                                                                                                                                                  |
| Participants                 | 6                  | <p>(a) <i>Cohort study</i>—Give the eligibility criteria, and the sources and methods of selection of participants. Describe methods of follow-up <a href="#">Page 7, first paragraph. Page 9, first paragraph</a></p> <p><i>Case-control study</i>—Give the eligibility criteria, and the sources and methods of case ascertainment and control selection. Give the rationale for the choice of cases and controls</p> <p><i>Cross-sectional study</i>—Give the eligibility criteria, and the sources and methods of selection of participants</p> <hr/> <p>(b) <i>Cohort study</i>—For matched studies, give matching criteria and number of exposed and unexposed <a href="#">Page 7, Paragraphs 1-2</a></p> <p><i>Case-control study</i>—For matched studies, give matching criteria and the number of controls per case</p> |
| Variables                    | 7                  | Clearly define all outcomes, exposures, predictors, potential confounders, and effect modifiers. Give diagnostic criteria, if applicable <a href="#">Page 8, paragraphs 4-7. Page 8, paragraphs 1-3. Page 9, paragraphs 3-6</a>                                                                                                                                                                                                                                                                                                                                                                                                                                                                                                                                                                                                  |
| Data sources/<br>measurement | 8*                 | For each variable of interest, give sources of data and details of methods of assessment (measurement). Describe comparability of assessment methods if there is more than one group <a href="#">Page 7, first and second paragraphs</a>                                                                                                                                                                                                                                                                                                                                                                                                                                                                                                                                                                                         |

|                        |    |                                                                                                                                                                                                                                                                                                                                                                                                                                                                                                                                                                                                                                                                                                     |
|------------------------|----|-----------------------------------------------------------------------------------------------------------------------------------------------------------------------------------------------------------------------------------------------------------------------------------------------------------------------------------------------------------------------------------------------------------------------------------------------------------------------------------------------------------------------------------------------------------------------------------------------------------------------------------------------------------------------------------------------------|
| Bias                   | 9  | Describe any efforts to address potential sources of bias <a href="#">Page 7, second paragraph</a>                                                                                                                                                                                                                                                                                                                                                                                                                                                                                                                                                                                                  |
| Study size             | 10 | Explain how the study size was arrived at <a href="#">N/A</a>                                                                                                                                                                                                                                                                                                                                                                                                                                                                                                                                                                                                                                       |
| Quantitative variables | 11 | Explain how quantitative variables were handled in the analyses. If applicable, describe which groupings were chosen and why <a href="#">Page 10, lines 1-3</a>                                                                                                                                                                                                                                                                                                                                                                                                                                                                                                                                     |
| Statistical methods    | 12 | <p>(a) Describe all statistical methods, including those used to control for confounding <a href="#">Page 10, lines 3-14</a></p> <p>(b) Describe any methods used to examine subgroups and interactions <a href="#">Page 10, first paragraph</a></p> <p>(c) Explain how missing data were addressed <a href="#">Not done</a></p> <p>(d) <i>Cohort study</i>—If applicable, explain how loss to follow-up was addressed</p> <p><i>Case-control study</i>—If applicable, explain how matching of cases and controls was addressed</p> <p><i>Cross-sectional study</i>—If applicable, describe analytical methods taking account of sampling strategy</p> <p>(e) Describe any sensitivity analyses</p> |

Continued on next page

## Results

|                  |     |                                                                                                                                                                                                                                                                                                                                                                                                                                                                                                     |
|------------------|-----|-----------------------------------------------------------------------------------------------------------------------------------------------------------------------------------------------------------------------------------------------------------------------------------------------------------------------------------------------------------------------------------------------------------------------------------------------------------------------------------------------------|
| Participants     | 13* | (a) Report numbers of individuals at each stage of study—eg numbers potentially eligible, examined for eligibility, confirmed eligible, included in the study, completing follow-up, and analysed <a href="#">Page 10, lines 17-18</a> . <a href="#">Page 14, lines 5-6</a> . <a href="#">Page 7, lines 1-3, line 7</a> .<br><br>(b) Give reasons for non-participation at each stage <a href="#">N/A</a><br><br>(c) Consider use of a flow diagram <a href="#">N/A</a>                             |
| Descriptive data | 14* | (a) Give characteristics of study participants (eg demographic, clinical, social) and information on exposures and potential confounders <a href="#">Page 10, lines 18-24</a> . <a href="#">Page 11, lines 1-11</a> . <a href="#">Tables 1 and 2</a> .<br><br>(b) Indicate number of participants with missing data for each variable of interest <a href="#">N/A</a><br><br>(c) <i>Cohort study</i> —Summarise follow-up time (eg, average and total amount) <a href="#">Page 13, lines 7-8</a>    |
| Outcome data     | 15* | <i>Cohort study</i> —Report numbers of outcome events or summary measures over time<br><br><a href="#">Page 12, paragraphs 3 and 4</a><br><br><a href="#">Page 13, first paragraph</a><br><br><a href="#">Table 3</a><br><br><a href="#">Figures 1, 2 and 4</a><br><br><i>Case-control study</i> —Report numbers in each exposure category, or summary measures of exposure<br><br><i>Cross-sectional study</i> —Report numbers of outcome events or summary measures                               |
| Main results     | 16  | (a) Give unadjusted estimates and, if applicable, confounder-adjusted estimates and their precision (eg, 95% confidence interval). Make clear which confounders were adjusted for and why they were included <a href="#">Page 12</a><br><br>(b) Report category boundaries when continuous variables were categorized <a href="#">Page 7, lines 3-5</a><br><br>(c) If relevant, consider translating estimates of relative risk into absolute risk for a meaningful time period <a href="#">N/A</a> |
| Other analyses   | 17  | Report other analyses done—eg analyses of subgroups and interactions, and sensitivity analyses <a href="#">N/A</a>                                                                                                                                                                                                                                                                                                                                                                                  |

## Discussion

|             |    |                                                                                                                                                                                                                                            |
|-------------|----|--------------------------------------------------------------------------------------------------------------------------------------------------------------------------------------------------------------------------------------------|
| Key results | 18 | Summarise key results with reference to study objectives <a href="#">Page 15, lines 9-11, 21-24</a> . <a href="#">Page 16, lines 1-3, 10-13, 14-21</a> . <a href="#">Page 17, lines 6-8, 14-16</a>                                         |
| Limitations | 19 | Discuss limitations of the study, taking into account sources of potential bias or imprecision. Discuss both direction and magnitude of any potential bias <a href="#">Page 18, first paragraph</a> . <a href="#">Page 17, lines 16-18</a> |

|                |    |                                                                                                                                                                                                                    |
|----------------|----|--------------------------------------------------------------------------------------------------------------------------------------------------------------------------------------------------------------------|
| Interpretation | 20 | Give a cautious overall interpretation of results considering objectives, limitations, multiplicity of analyses, results from similar studies, and other relevant evidence <a href="#">Page 18, last paragraph</a> |
|----------------|----|--------------------------------------------------------------------------------------------------------------------------------------------------------------------------------------------------------------------|

---

|                  |    |                                                                                                           |
|------------------|----|-----------------------------------------------------------------------------------------------------------|
| Generalisability | 21 | Discuss the generalisability (external validity) of the study results <a href="#">Page 15, lines 9-16</a> |
|------------------|----|-----------------------------------------------------------------------------------------------------------|

---

#### **Other information**

|         |    |                                                                                                                                                                                                       |
|---------|----|-------------------------------------------------------------------------------------------------------------------------------------------------------------------------------------------------------|
| Funding | 22 | Give the source of funding and the role of the funders for the present study and, if applicable, for the original study on which the present article is based <a href="#">Page 19, last paragraph</a> |
|---------|----|-------------------------------------------------------------------------------------------------------------------------------------------------------------------------------------------------------|

\*Give information separately for cases and controls in case-control studies and, if applicable, for exposed and unexposed groups in cohort and cross-sectional studies.

**Note:** An Explanation and Elaboration article discusses each checklist item and gives methodological background and published examples of transparent reporting. The STROBE checklist is best used in conjunction with this article (freely available on the Web sites of PLoS Medicine at <http://www.plosmedicine.org/>, Annals of Internal Medicine at <http://www.annals.org/>, and Epidemiology at <http://www.epidem.com/>). Information on the STROBE Initiative is available at [www.strobe-statement.org](http://www.strobe-statement.org).
